# Supplementary material
Source: MDPI journal article supplement (https://www.mdpi.com/2227-9040/11/7/404)
Supplement: s1 [file s1]

# Bi<sub>2</sub>WO<sub>6</sub>@g-C<sub>3</sub>N<sub>4</sub> Heterostructure for Cathodic Photoelectrochemical Dopamine Sensor

Zhifang Wu <sup>1</sup>, Ying Su <sup>1</sup>, Fangjie Han <sup>1</sup>, Zhishan Liang <sup>1</sup>, Dongxue Han <sup>1,2,\*</sup>, Dongdong Qin <sup>1,\*</sup> and Li Niu <sup>1</sup>

<sup>1</sup> Guangzhou Key Laboratory of Sensing Materials and Devices, Guangdong Engineering Technology Research Center for Photoelectric Sensing Materials and Devices, School of Chemistry and Chemical Engineering, Guangzhou University, Guangzhou 510006, China; fjhan@gzhu.edu.cn (F.H.); lniu@gzhu.edu.cn (L.N.)

<sup>2</sup> Guangdong Provincial Key Laboratory of Psychoactive Substances Monitoring and Safety, Anti-Drug Tethnology Center of Guangdong Province, Guangzhou 510230, China

\* Correspondence: dxhan@gzhu.edu.cn (D.H.); ccqindd@gzhu.edu.cn (D.Q.)

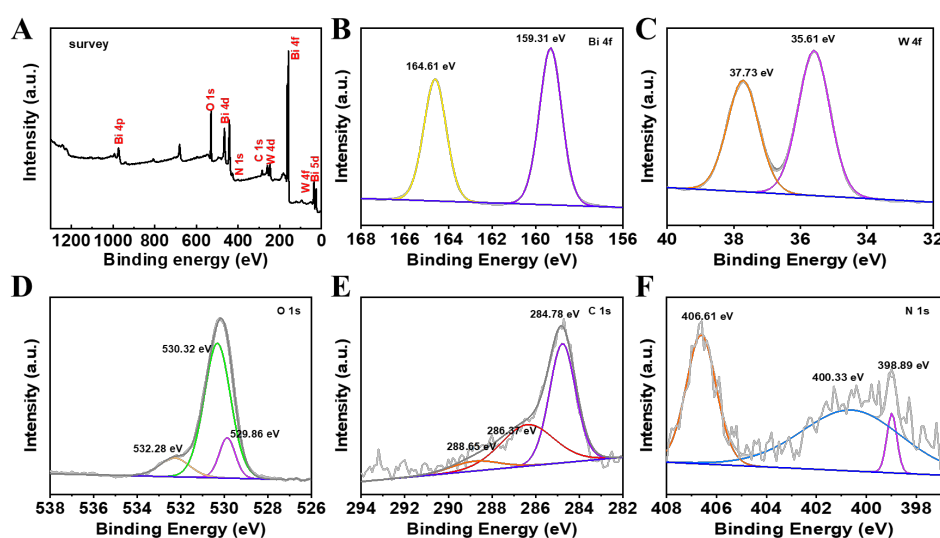

**Figure S1.** The XPS spectra of the BWO-0.05CN (A) Full scan, (B) Bi 4f, (C) W 4f, (D) O 1s, (E) C 1s, (F) N 1s.

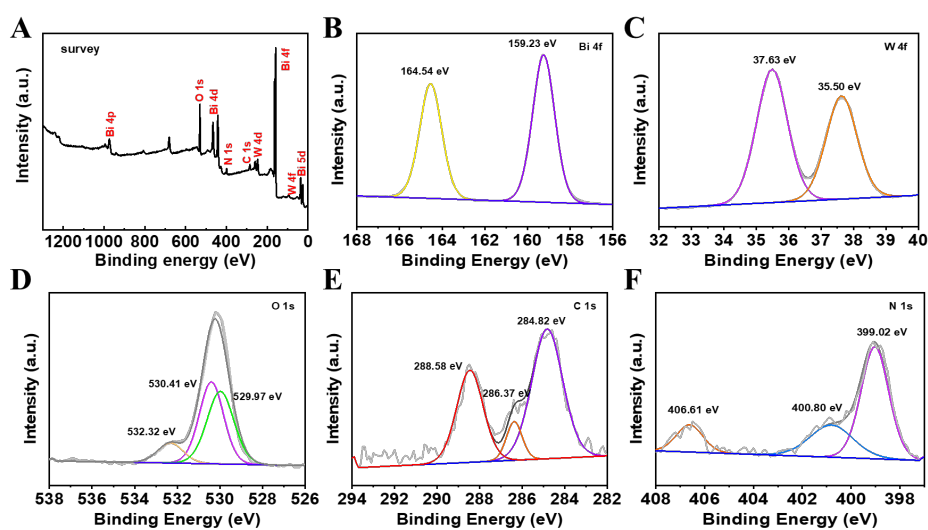

**Figure S2.** The XPS spectra of the BWO-0.15CN (A) Full scan, (B) Bi 4f, (C) W 4f, (D) O 1s, (E) C 1s, (F) N 1s.

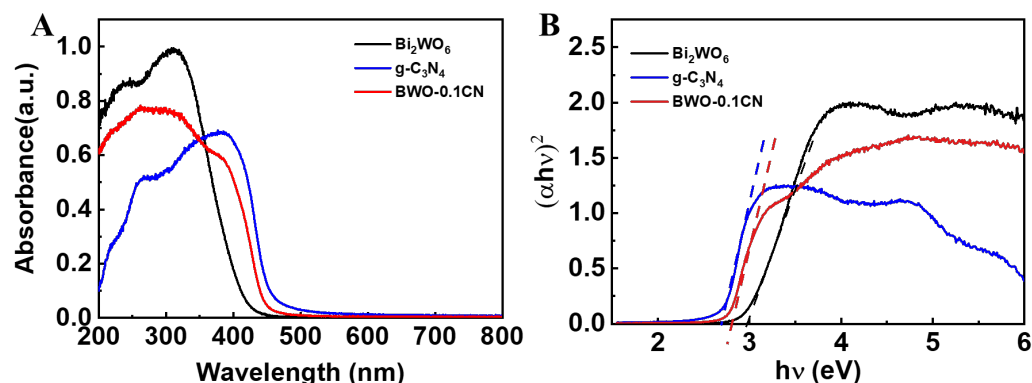

**Figure S3.** (A) UV-vis diffuse reflectance absorption spectra, (B) the corresponding K-M plot of  $\text{Bi}_2\text{WO}_6$ ,  $\text{g-C}_3\text{N}_4$ , and  $\text{BWO-0.1CN}$ .

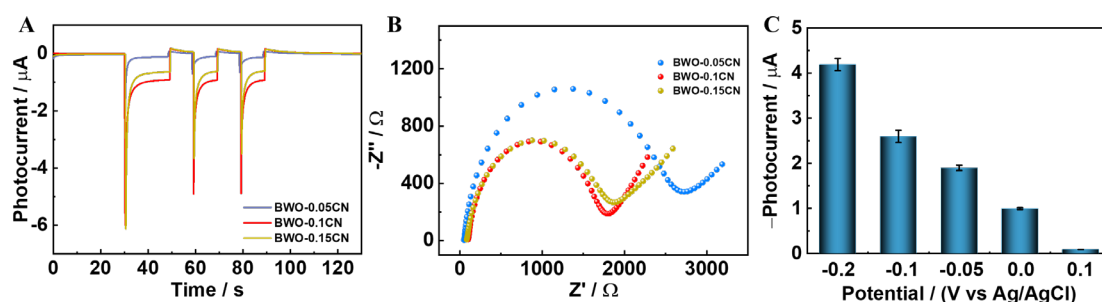

**Figure S4.** (A) Photocurrent response of  $\text{BWO-0.05CN}$ ,  $\text{BWO-0.1CN}$ , and  $\text{BWO-0.15CN}$  in the presence of  $50 \mu\text{M}$  DA. (B) EIS spectra of  $\text{BWO-0.05CN/FTO}$  and  $\text{BWO-0.1CN/FTO}$  in  $5 \text{ mM } [\text{Fe}(\text{CN})_6]^{3-/4-}$  containing  $0.1 \text{ M KCl}$ . (C) Effects of the applied potential on photocurrent response of  $\text{BWO-0.1CN/FTO}$  electrode in  $0.1 \text{ M PBS (pH=7.4)}$  containing  $50 \mu\text{M}$  DA.

**Table S1.** Comparison of previous and current DA detection methods.

| Material                                              | Method | Linear Range ( $\mu\text{M}$ ) | Limit of Detection ( $\mu\text{M}$ ) | Refs.     |
|-------------------------------------------------------|--------|--------------------------------|--------------------------------------|-----------|
| F-CuInS <sub>2</sub>                                  | FL     | 1-100                          | 0.5                                  | [1]       |
| Cu-MOFs/MWCNT- Au@Ag/GCE                              | EC     | 0.6-70 and 70-300              | 0.082                                | [2]       |
| DMSA-CdTe QDs/FTO                                     | PEC    | 0.4–10000                      | 0.17                                 | [3]       |
| Ti <sub>3</sub> C <sub>2</sub> /TiO <sub>2</sub>      | PEC    | 0.125-400                      | 0.045                                | [4]       |
| Ti <sub>3</sub> C <sub>2</sub> @(001)TiO <sub>2</sub> | PEC    | 1-1000                         | 0.52                                 | [5]       |
| ZnPc-P8BT-Pdots                                       | PEC    | 0.0025-125                     | 0.00169                              | [6]       |
| $\text{Bi}_2\text{WO}_6@\text{g-C}_3\text{N}_4$       | PEC    | 0.1-10 and 10-250              | 0.028                                | This work |

## References

- Liu, S.; Shi, F.; Zhao, X.; Chen, L.; Su, X., 3-Aminophenyl boronic acid-functionalized CuInS<sub>2</sub> quantum dots as a near-infrared fluorescence probe for the determination of dopamine. *Biosens. Bioelectron.* **2013**, *47*, 379–384.
- Yao, W.; Guo, H.; Liu, H.; Li, Q.; Xue, R.; Wu, N.; Li, L.; Wang, M.; Yang, W., Simultaneous electrochemical determination of acetaminophen and dopamine based on metal-organic framework/multiwalled carbon nanotubes-Au@Ag nanocomposites. *J. Electrochem. Soc.* **2019**, *166*, B1258–B1267.
- Hao, Q.; Wang, P.; Ma, X.; Su, M.; Lei, J.; Ju, H., Charge recombination suppression-based photoelectrochemical strategy for detection of dopamine. *Electrochem. Commun.* **2012**, *21*, 39–41.
- Wu, Z.; Han, F.; Wang, T.; Guan, L.; Liang, Z.; Han, D.; Niu, L., A recognition-molecule-free photoelectrochemical sensor based on Ti<sub>3</sub>C<sub>2</sub>/TiO<sub>2</sub> heterostructure for monitoring of dopamine. *Biosensors* **2023**, *13*, 526.
- Chen, Y.; Li, X.; Cai, G.; Li, M.; Tang, D., In situ formation of (001)TiO<sub>2</sub>/Ti<sub>3</sub>C<sub>2</sub> heterojunctions for enhanced photoelectrochemical detection of dopamine. *Electrochem. Commun.* **2021**, *125*, 106987.
- Peng, J.; Li, X.; Liu, Y.; Zhuge, W.; Zhang, C.; Huang, Y., Photoelectrochemical sensor based on zinc phthalocyanine semiconducting polymer dots for ultrasensitive detection of dopamine. *Sensor. Actuat. B Chem.* **2022**, *360*, 131619.
